# Supplementary material for: Polyethylene Terephthalate Hydrolases in Human Gut Microbiota and Their Implications for Human Health
Source: MDPI journal article supplement (doi:10.3390/microorganisms12010138), 2024-01-10
Supplement: s1 [file s1]

## **Supplementary information**

Polyethylene Terephthalate Hydrolases in Human Gut Microbiota and  
Their Implications on Human Health

**Table S1** Nucleotide sequence of HG1-5.

**Table S2** Primers used in this study.

**Figure S1** Neighbor-joining phylogenetic tree based on the amino acid sequences

showing the phylogenetic location of 40 sequences.

**Figure S2** Distribution of catalytic triplets and surrounding amino acids. Green represents catalytic triad S-H-D.

**Figure S3** Multiple-sequence alignment of HG2-4. Red markings indicate conservative sequences.

**Figure S4** Effects of terephthalic acid (TPA) and mono(2-hydroxyethyl) terephthalic acid (MHET) on viability of Caco2 cells and FHC cells.

**Figure S5** Relative expression levels of IL-1 $\beta$ , IL-6 and TNF- $\alpha$  in RAW 264.7 cells with different treatments.

**Table S1** Nucleotide sequence of HG1-5.

| Sample number | Sequence                                                                                                                                                                                                                                                                                                                                                                                                                                                                                                                                                                                                                                                                                                                                                                                                                                                                                                                                                                                                                                                                                                                                                                                                                                                                                                                                                                                                                                                                                                                                                                                                                                                                                                 |
|---------------|----------------------------------------------------------------------------------------------------------------------------------------------------------------------------------------------------------------------------------------------------------------------------------------------------------------------------------------------------------------------------------------------------------------------------------------------------------------------------------------------------------------------------------------------------------------------------------------------------------------------------------------------------------------------------------------------------------------------------------------------------------------------------------------------------------------------------------------------------------------------------------------------------------------------------------------------------------------------------------------------------------------------------------------------------------------------------------------------------------------------------------------------------------------------------------------------------------------------------------------------------------------------------------------------------------------------------------------------------------------------------------------------------------------------------------------------------------------------------------------------------------------------------------------------------------------------------------------------------------------------------------------------------------------------------------------------------------|
| HG-1          | ATGCAAAATCCTTCCGCCCCTGTGGTTGAAACGCGCCAGGGCGCA<br>CTGACTGGTTTAAACCGATGAAAATGTCCACCGCTGGTGCGGTATTC<br>CCTATGCTGCACCGCCAGTGGGTGACTGGCGCTGGCGCTCACCGC<br>GCCACCAGAACGCTGGGATGGCGTTCGCGATGCCACTGCCTTTTC<br>GGCCTCAAGCTGGCAAAGCAGTGAATATTGTCAGGAGCTGGGCGG<br>GGGCGATCCCGGCCAGTTCTCTGAAGACTGTCTCTATCTGAATGTC<br>TGGTCCCCCGTCGACCGCCCGGGATCGCTTCCGGTGATGGTCTGGC<br>TGCACGGGGGCGGGTTTACGATTGGTGCCGGTGGTCTGCCACCGT<br>ATCACGGCAAATCCCTGGCCGCGCGCGGCGTGGTTGTGGTCACGA<br>TTAACTACCGTCTCGGCCATCTCGGCTTTTTCGCCCATCCCGCGCTG<br>GAGGGGGAAGAAGAGCGGGTAGTGCATAATTTTGCTCTGCTTGAT<br>CAGATTGCCGCGCTTGAATGGGTGCGGGAGAATATCACCGCGTTTG<br>GGGGCGACCCGCATAACGTGACCCTGTTTGGTGAGTCCGCTGGCG<br>CCCGCAGCGTGCTGTCTGTTGCTGGCCTCGCCGCTGGCGGAAGGGC<br>TGTTCCACAAGGCGATAGTCCAGAGTGGATATACCTTGCCCGACAC<br>GCCGCGCCAGCAGGCGCTGCAAAAAGGGGAAGCACTGGCGGCCC<br>ATTTTGGGCTGGAGAACGCGACGGCAGAGCAGCTGCGCGCGATCC<br>CGCCTGAGTCATTCTGGCCGCTGACCGCGCCACTCAACATCGCCCC<br>GGCGCCGATCGTCGGGGATTGCGTCCTGCCGGAGGCCATGCTGGA<br>TGTCTTTTTCGCTGCCCGCCAGCACCTGTGCCGGTGATGATAGGT<br>TCTAACAGCGATGAAGCCAGCGTCATGGCGGTGTTTGGCATCGATC<br>TCGCCGGGCAAATCCAGAACTTCGCCGGGAGCGCCGTTTTTGGGC<br>TGGGGCTCATCAAGCTGCTTTATCCGGGTGTGAAAGGCGACGAAG<br>AGCTGGGCAGACAGGTGTGTCGCGATATGGCGTTTACCACCATGG<br>GCTATGTCGTGATGCAGGCGCAGCAGCGTGTCGGCGGGCTTTGCT<br>GGCGTTACTGGTTTGACTATGTCGCTGAAGCGGAGCATGCCACCTA<br>TATCAACGGCGCGTGGCATGGCAATGAAGTGCCCTACGTGTTTCGAT<br>ACCCTCGGCCAGGTGGAGCCTTCACGTCAGTATGTCAACGAACGG<br>GATTTACAGTTTGCTGCCAGGGTAGCCGATTACTGGGTAAGCTTTG<br>CGCGCGATGCCGGAACGCATGATAGCCTGTGCGGGGCCGACGCACT<br>GGCCCGCGTGCCGTAAAGGACGGGACGTGCTGCTACGTATCGGTG<br>TGAATAAACATGCAGGTTTCAGGCTTGAAAACCGCTTTATGCGCGC<br>GCGCATGAGCCTCTTTAAACGGGTGATGAAGCACCACGTCAGCCT<br>CGATTAA |
| HG-2          | ATGCAGAAATACGTTGAAATCAAGCGCGACGGGTAAACCTTACGG<br>GGGATGCTGCACATTCCGAACGACGTTGTGAGCCAGAAAGTTCCG<br>ATGGTTATTCTGTTACACGGCTTTTGTGACGACCGCAATGAAATAA<br>ATTTTGTTCAATGAGCTGAGTCAGAGACTGTGTGATGCAGGTAT<br>AGCAAGTGTTAGATTCGATATGAATGGTAGTGGTGAAAGCGACGGT<br>CGTTTTGAGGATATGACAGTTAGCAGCGAGATTTTAGACGCACAAG                                                                                                                                                                                                                                                                                                                                                                                                                                                                                                                                                                                                                                                                                                                                                                                                                                                                                                                                                                                                                                                                                                                                                                                                                                                                                                                                                                                                     |

---

CAATGCTGAGATATGTTTCGTAGCCTGGATTTTGTGTGATACCAAAAA  
GATTGCACTGCATGGTTGTAGCCTGGGTGGTTGTGTTGCATCAATG  
GTTGCAGGTAAGTGTAAGACCAGATTTCGTGCCCTGTCCCTGTGGT  
GTCCTGCGCCGATCTGGTTTATAATCTGAAAGAACATAAGACCCT  
GTGTAATCAGGATGTGAGTAATATTGAAAAGGATGGCTGCGCAGAT  
GTTGAGGGTTTAAAACTTAGCCTGAAATTTTATCAGGACGCATGTA  
CCCTGGATCCATATAAAGAAGCAAGCCTGTTTGATAAAAAACGTTTG  
CACGATACATGGTGATCAGGATATTACCGCAAGTTGCGAATGTAGC  
TATAAATATAAAGAGATCTTCAAGGAGCGTGCAAAATGTATTATTGT  
AAAAGGTGCAGAACACCGCTTTAAAAGCTTCGCATTTTCGTGAAGC  
ACGTATGCAGGGGGCACTGGATTTTCTGAAAGAAGAGCTGCTGTA  
A

---

HG-3 ATGGAAAAGAGCGTGCTGATCAAAGGCGACAACCTATGACATTAGC  
GGGATTCTGAGCTATAAAGAAACCGTGGATAAAATGCCGGCGGTG  
ATCCTGTGTCACGGCACCGGGGACAGAAAAATGAAGTTGGTGAT  
CTGTTTGTGATTCTGGCCGAAAACTGCTGCAGCGTGGAATTGCA  
AGCATTCGTATTGATTACGCAGGATGTGGCGATAGCAAGGCAGACC  
AGCGGGAATTAACCTTTCTGGGTGAAGTTGAGGATACCAAAAAGG  
CATACCAATATATATGTGATCTGGGTGTGTTGATCAGAAAAATATT  
GGAATTTTAGGGTTCAGCCAGGGAGCAAGAGTGGTTGCAGAATTA  
CTGAAAGAGATGCAGGAATTTACCTGTGTTGCAAGCTGGAGTGGG  
GCGTGTCAGAATGGTCGTGGCGTCTTCGAAGGGTGGTTTCAGGAA  
TATTATCAGGAAGCAGAAGAACATGGTTATGCGAGAATCCCTATGG  
GCTGGCGTGATGATCTGCTGCTGAGTAAGCAGTGGTTTGATGAAAT  
TGAAAATACCACACCGATGGATGGACTGAAAAAGTATACCGGTCC  
GGTACTGGCCGTTGCAGGTGCAGCGGATGAAATTGTGCCGTGTTC  
CCATACCAAAGAAATCATGGCAGAAGGCACAAATGAACAAAGCAA  
AATGCTGATCCTGCCGGGGGCAGATCATATTTTAAATGTGTAAAGCG  
GTGATAAGACAATGAGTGAACATGTTTTAGATGTGACCGCAGACTG  
GTTTGCAGAGGTGATGGGTGGAGCAAAAATTAGCAAATAA

---

HG-4 ATGGACGAAAACCTACCCGTTCTGCCGGGCGCGGACAGCTTTTTT  
ATTAAAGGTAACGAAATCGGTATCCTGATTAGCCACGGCTTTAATG  
GTACCCCGCAGAGCGTTCGTTTTCTGGGTAGAGCAATGGCAAGCG  
ATGGTTTCACAGTTTGTGCACCGCGTCTGAAAGGTCATGGTACACA  
CTACCTGGACATGGAACGTTGTACGTATAAAGATTGGATTGATAGC  
CTGGAAGAAGGTTATCAGCTGCTGAAGCGTCATTGCCGTGATATT  
TTGTCAATTGGTCAGAGCATGGGCGGTACCTTAGCGCTGCATTTAGC  
CGAAAAACATCCGGATATTAGAGGAATGGTGTGTATAAATGCAGCC  
ATTCAGTCAATTCCGGAACCTGGAAAAATGTCTGGCAAAAGGCCGG  
TATATTCAGGAGGGTCCACCGGATATTAAAGCAGCAGGTGTTTCATG  
AAATAGCATATGAGAAAGTGCCGGCAGCAAGCATAACGGGAACCTGC  
TGAGCGTGATGAGAGAAACAAGAGAAAATTTAAGCGCAATTCACT  
GTCCGGCACTGTTTTTTCAGAGTACCGAGGACCATGTTGTTCCGCC  
GGAAAATACCGATTACATTGCAGCCCATATATTAGCGAGCCGTAAA

---

---

|      |                                                                                                                                                                                                                                                                                                                                                                                                                                                                                                                                                                                                                                                                                                                                                                                                                                                                                                                                                                                                                                                                |
|------|----------------------------------------------------------------------------------------------------------------------------------------------------------------------------------------------------------------------------------------------------------------------------------------------------------------------------------------------------------------------------------------------------------------------------------------------------------------------------------------------------------------------------------------------------------------------------------------------------------------------------------------------------------------------------------------------------------------------------------------------------------------------------------------------------------------------------------------------------------------------------------------------------------------------------------------------------------------------------------------------------------------------------------------------------------------|
|      | AAGATAATCCCGTTACGTAACCTCATGTTGCAACCATGGACC<br>ATGAAAAAGAATGGATTGCAGCACAAATGTAGCAGCTTTGTGCAGG<br>AAATTGCCCATATTGAAAGCCGTACCGAAATTTAA                                                                                                                                                                                                                                                                                                                                                                                                                                                                                                                                                                                                                                                                                                                                                                                                                                                                                                                            |
| HG-5 | ATGAAGAAGCTGCTGAAAGTGCTGCTGATTATTTTTTTAGTTATCGT<br>TGTGCTGGTGATTGGTCTGGTGATTTTTCTGACGATTGCGAGCGGG<br>AAGCAGAATGCACCGAAAGAGTATTGGAATGCAATTGCCAGCGAA<br>GGTACCATTGAGAAGGAGTATAATAAACTGGGTAGTTACGAATTTG<br>AGAGCAAAGTTTATGATGCACCAAAAGTGGACAGCCATGATAATA<br>ATTTTGTGTGTATATGCCGAAGGAAGAAGGAACCTATCCGTTAGT<br>TGTTATGGTTAATGGTAGCGGTACGCCGTGGGATAAGTATAAAGCA<br>GTTTTTGAACATTTTCGCAAGCTGGGGATATGTTGTTGTGGGGTGTA<br>ATTATGAAATAAGCTGGGATGGTAAGCATGCAAGTGAGACATTAGA<br>TTTTGCACTGAATACCAAAGAGATAGCAGATAAAGTTGATACCTCA<br>AAGGTGGCAGTTTGTGGTCATAGTCAGGGGGGGGAAGGGGCGTTT<br>AATGCAGCATTAGAATATGACAATAGCGATATGTATAAGGCAATAAT<br>AAGCCTGAGCCCGACGAATCAGGAGCTGGCGCTGGGGCTGAAATG<br>GGGATTTAATCTGGATACAGATGATATGTACGCATATAGACTGGAAA<br>ATGTTACAATTCCGACAATGATTATCGCAGGTACAGGTAAATTCGAT<br>AGCGAAACCGTTACACCCCTGTATAAGATGGAAGACATGTTTGAAC<br>AGCTGAATACCGATGTGGTTATGGCAAGACTGAGCAATAATGTTGA<br>TCATGGAGCAGTTCTGTACGAGGCAAATGGATATGTGATTGCATGG<br>CTGGACTATTATCTGAAGGGTATTGAAACCAATGGCACCGCATTTTT<br>TGGTAATGAAGCAGAAATCAAAAACAACACAAGATATCAGGATTT<br>CACCTCCCAGAAAGTTAAGTAA |

---

**Table S2** Primers used in this study.

| Gene          | Primer  | Sequence                 |
|---------------|---------|--------------------------|
| GAPDH         | Forward | AGGTCGGTGTGAACGGATTTG    |
|               | Reverse | TGTAGACCATGTAGTTGAGGTCA  |
| IL-1 $\beta$  | Forward | TCGCAGCAGCACATCAACAAGAG  |
|               | Reverse | TGCTCATGTCCTCATCCTGGAAGG |
| IL-6          | Forward | CTCCCAACAGACCTGTCTATAC   |
|               | Reverse | CCATTGCACAACCTCTTTTCTCA  |
| TNF- $\alpha$ | Forward | ATGTCTCAGCCTCTTCTCATTC   |
|               | Reverse | GCTTGTCACTCGAATTTTGAGA   |
| Arg-1         | Forward | CATATCTGCCAAAGACATCGTG   |
|               | Reverse | GACATCAAAGCTCAGGTGAATC   |

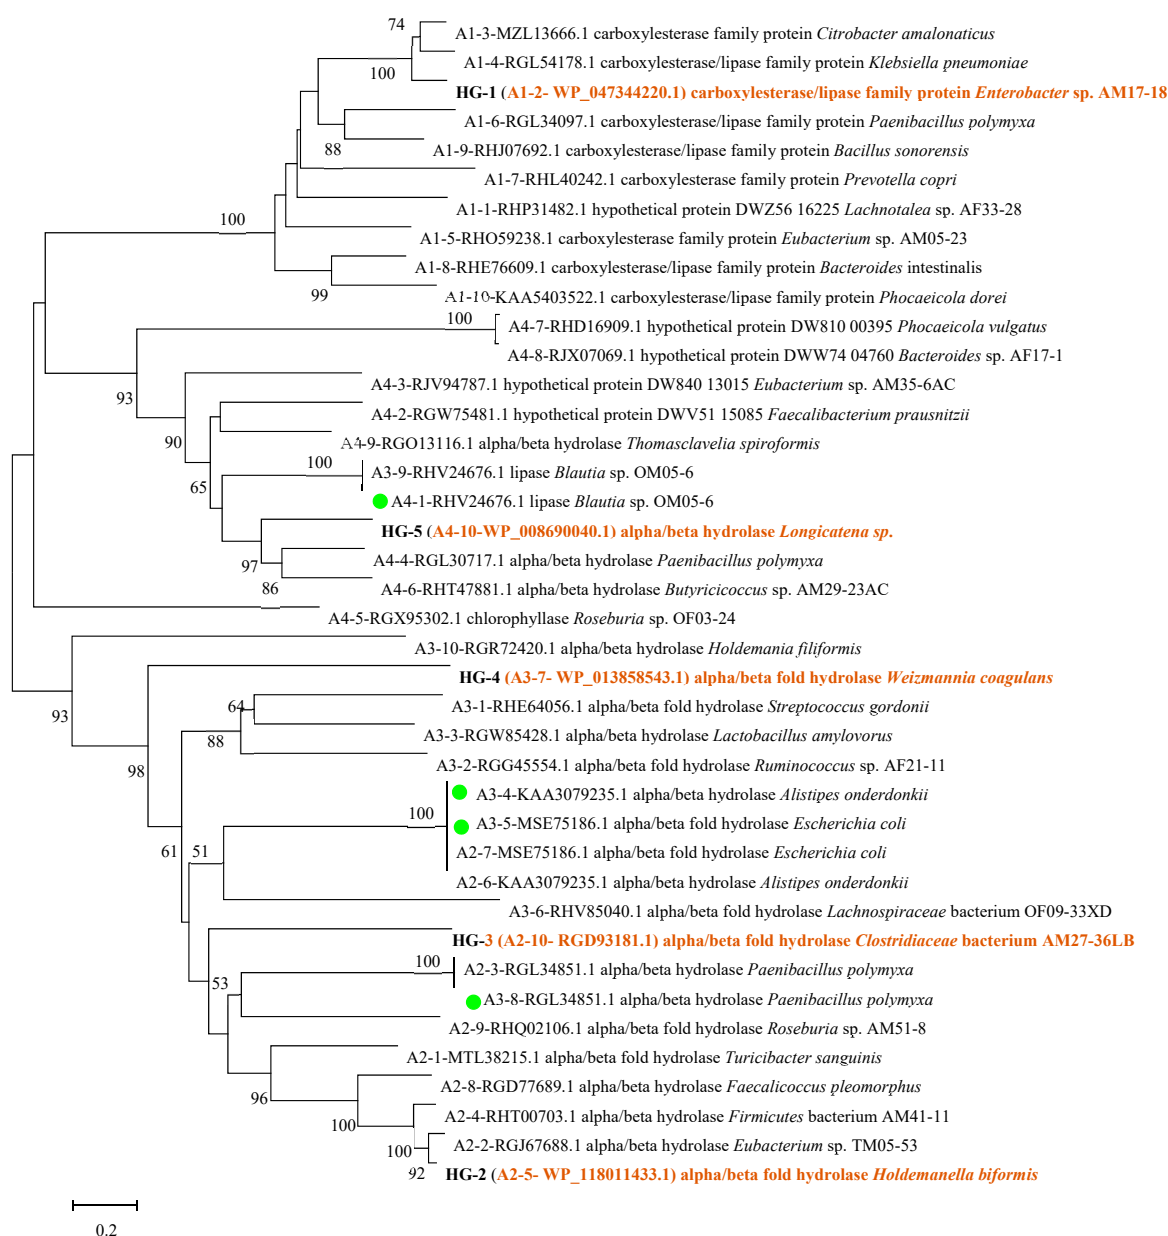

**Figure S1** Neighbor-joining phylogenetic tree based on the amino acid sequences showing the phylogenetic location of 40 sequences. Numbers at nodes indicate the percentage of 1000 bootstrap replicates. Only bootstrap values above 50 % are shown. Bar represents 0.2 substitutions per nucleotide position. Green circles indicate repeating sequences. Pink bold font represents the sequence of expressed proteins.

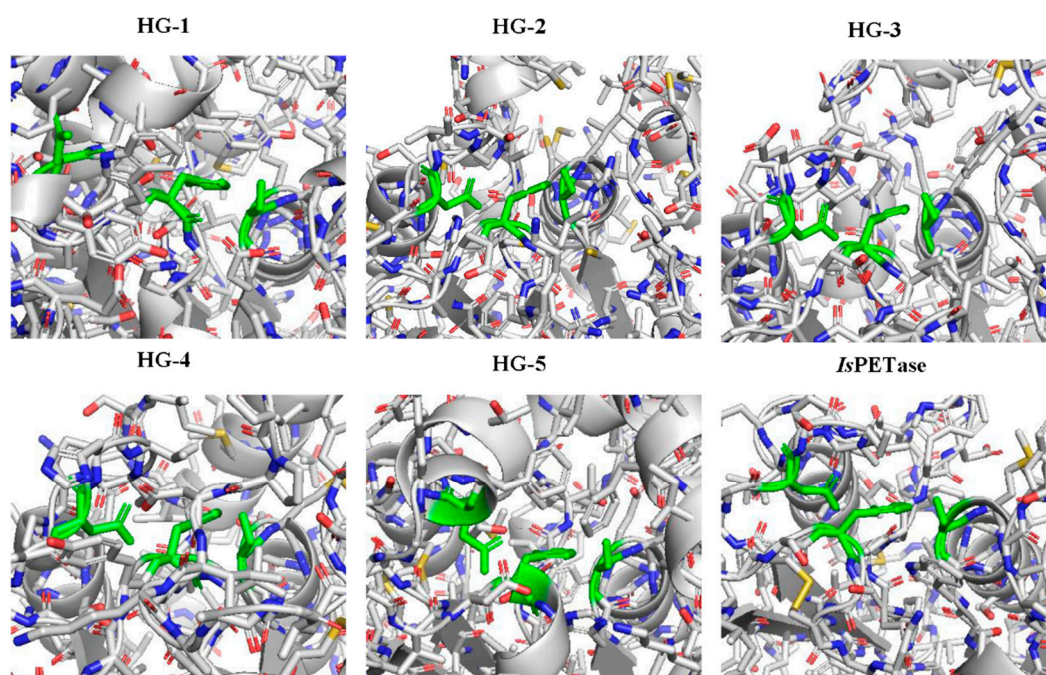

**Figure S2** Distribution of catalytic triplets and surrounding amino acids. Green represents catalytic triad S-H-D.

|     |        |        |        |                 |            |                         |
|-----|--------|--------|--------|-----------------|------------|-------------------------|
|     | 1      | 10     | 20     | 30              | 40         | 50                      |
| HG2 | ..MQKY | VEIKR  | DGLTLR | GMLHIPNDVVSQKVP | MVILL      | HGFCDDRNEINFVHNELSQRLCD |
| HG3 | ..MEKS | VLIKGD | NYDIS  | GILSYKETVD      | ..KMPAVILC | HGTGAQKNEVGDLFVILAELLQ  |
| HG4 | MDENYP | VLPGAD | SFFIK  | CNEIG           | .....ILIS  | HGFNGTPQSVRFLGRAMAS.... |

  

|     |         |       |    |        |      |                            |
|-----|---------|-------|----|--------|------|----------------------------|
|     | 60      | 70    | 80 | 90     | 100  | 110                        |
| HG2 | AGIASVR | FDMN  | GS | GESDGR | FEDM | TVSSEILDAQAMLRVRS          |
| HG3 | RGIASIR | IDYAG | CG | DSKADQ | REL  | TFLGEVEDTKKAYQYICDLGCVDQKN |
| HG4 | DGFTVC  | APRLK | GH | GTHYLD | MERC | TYKDWIDSLEEGYQLLKRH....CRD |

  

|     |              |                                 |                            |             |     |     |
|-----|--------------|---------------------------------|----------------------------|-------------|-----|-----|
|     | 120          | 130                             | 140                        | 150         | 160 | 170 |
| HG2 | VASMVAGKCKDQ | ..IRALSLWCPAPDLVYNLKEHKTLCNQDVS | NIKDG                      | CADVEGLKLSL |     |     |
| HG3 | VVAELLKEMQ   | EFTCVASWSGACQNGRGVFEGWFQ        | EYYQEAEEHGYARIPMGWRDDLLLSK |             |     |     |
| HG4 | LALHLAEKH    | PDIRGMVCINAAIQSIPELEKCLAKGRYIQ  | EGPPDIKAAGVHEIAYEKVPA      |             |     |     |

  

|     |          |                          |                       |                  |                       |          |
|-----|----------|--------------------------|-----------------------|------------------|-----------------------|----------|
|     | 180      | 190                      | 200                   | 210              | 220                   | 230      |
| HG2 | KFYQDA   | CTLD                     | ..PYKEASLFDKNVCTIHGDQ | DITASCECS        | .YKYKEIFKERA          | KCIIVKGA |
| HG3 | QWFDEI   | ENTTT                    | ..PMDGLKKYTG          | PVLAVAGAA        | DEIVPCSHTKEIMAEGTNEQS | KMLILPGA |
| HG4 | ASIRELLS | VSMRETRENLSAIHCPALFFQSTE | DHVVP                 | PENTDYIAAHILASRK | KIIPLRNS              |          |

  

|     |     |                                     |
|-----|-----|-------------------------------------|
|     | 240 | 250                                 |
| HG2 | E   | HRFKSFAFREARMQGALDFLKEELL.....      |
| HG3 | D   | HIFNVLSGDKTMSEHVLDVTADWFAEVMGGAKISK |
| HG4 | Y   | HVATMDHEKEWIAAQCSFVQETIAHIESRTEI... |

**Figure S3.** Multiple-sequence alignment of HG2-4. Red markings indicate conservative sequences.



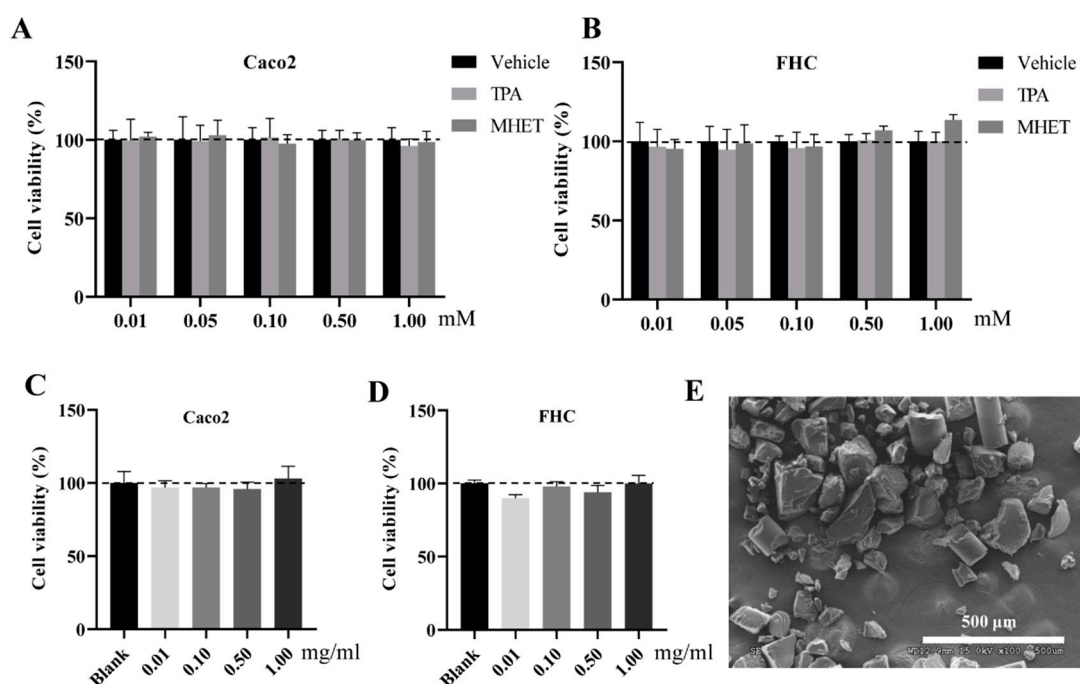

**Figure S4** Effects of terephthalic acid (TPA) and mono(2-hydroxyethyl) terephthalic acid (MHET) on viability of Caco2 (**A**) and FHC cells (**B**). The same concentrations of DMSO (maximum 0.1%) were added to the medium for the vehicle control. Viability of (**C**)Caco2 cells and (**D**) FHC cells in response to PET MPs (< 400 µm). Mean values ± standard deviation of n=6 independent experiments were given. Statistical analysis was conducted by One-way ANOVA followed by Tukey's test. **E** SEM images of PET MPs particles.

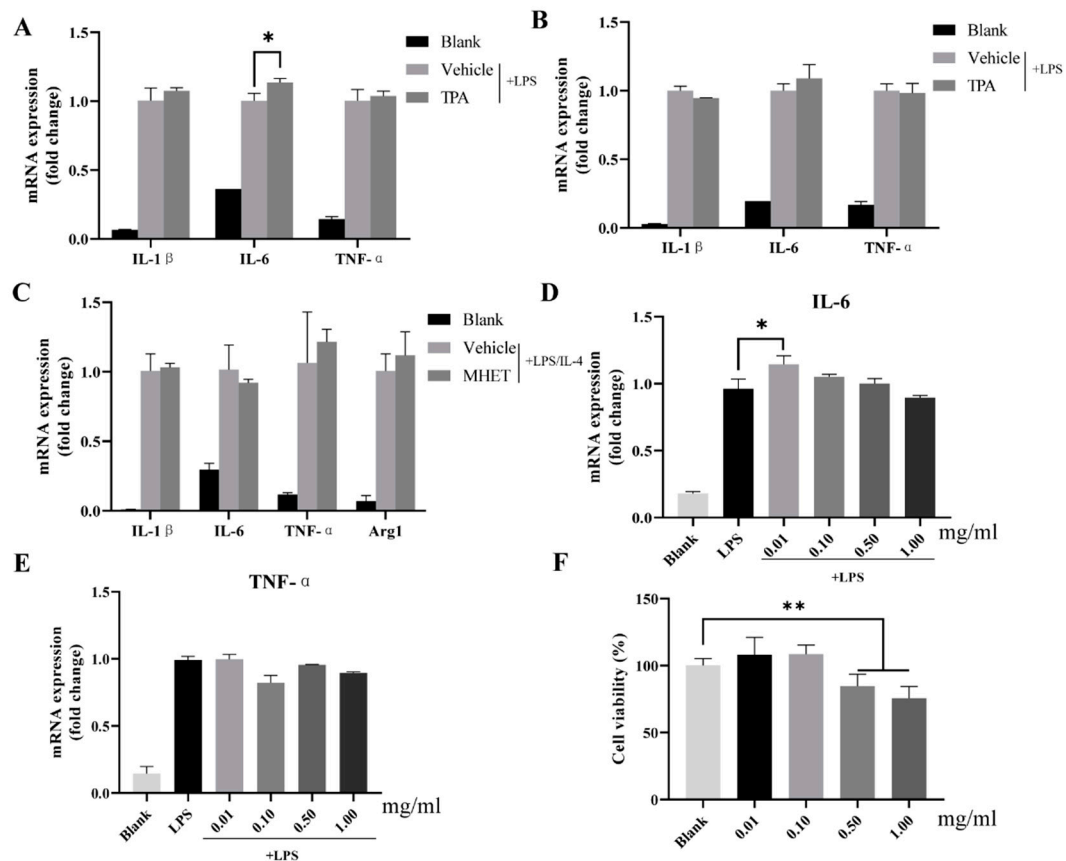

**Figure S5** Relative expression levels of IL-1 $\beta$ , IL-6 and TNF- $\alpha$  in RAW 264.7 cells treated with TPA (0.10 mM) (**A**) and TPA (0.50 mM) (**B**) for 24 hours followed by lipopolysaccharides (LPS) stimulation for 6 hours. **C** Relative expression levels of IL-1 $\beta$ , IL-6, TNF- $\alpha$  and Arg-1 (IL-4 stimulation) in RAW 264.7 cells treated with MHET (1.00 mM) for 24 hours followed by LPS/IL-4 stimulation for 6 hours. Relative expression levels of IL-6 (**D**) and TNF- $\alpha$  (**E**) in RAW 264.7 cells treated with PET MPs (< 400  $\mu$ m) at a gradient dose at 0.01, 0.10, 0.50 and 1.00 mg/ml for 24 hours followed by LPS stimulation for 6 hours. **F** Viability of RAW 264.7 cells in response to PET MPs (< 400  $\mu$ m) at a gradient dose at 0.01, 0.10, 0.50 and 1.00 mg/ml. \*\*p-value < 0.01; \* p-value < 0.05;
